# Supplementary material for: Bandgap engineering of germanene for gas sensing applications
Source: Royal Society of Chemistry journal article supplement (doi:10.1039/d3ra05927h), 2023-01-01
Supplement: d3ra05927h1.pdf [file d3ra05927h1.pdf]

## **Bandgap Engineering of Germanene for Gas Sensing Applications**

Ong Kim Le<sup>1,2</sup>, Viorel Chihai<sup>3</sup>, Do Ngoc Son<sup>4,5,\*</sup>

<sup>1</sup>*Institute of Fundamental and Applied Sciences, Duy Tan University, Ho Chi Minh City, 700000, Vietnam.*

<sup>2</sup>*Faculty of Natural Sciences, Duy Tan University, Da Nang City, 550000, Vietnam.*

<sup>3</sup>*Institute of Physical Chemistry “Ilie Murgulescu” of the Romanian Academy, Splaiul Independentei 202, Sector 6, 060021 Bucharest, Romania.*

<sup>4</sup>*Ho Chi Minh City University of Technology (HCMUT), 268 Ly Thuong Kiet Street, District 10, Ho Chi Minh City, Vietnam.*

<sup>5</sup>*Vietnam National University Ho Chi Minh City, Linh Trung Ward, Ho Chi Minh City, Vietnam.*

\*E-mail: [dnson@hcmut.edu.vn](mailto:dnson@hcmut.edu.vn)

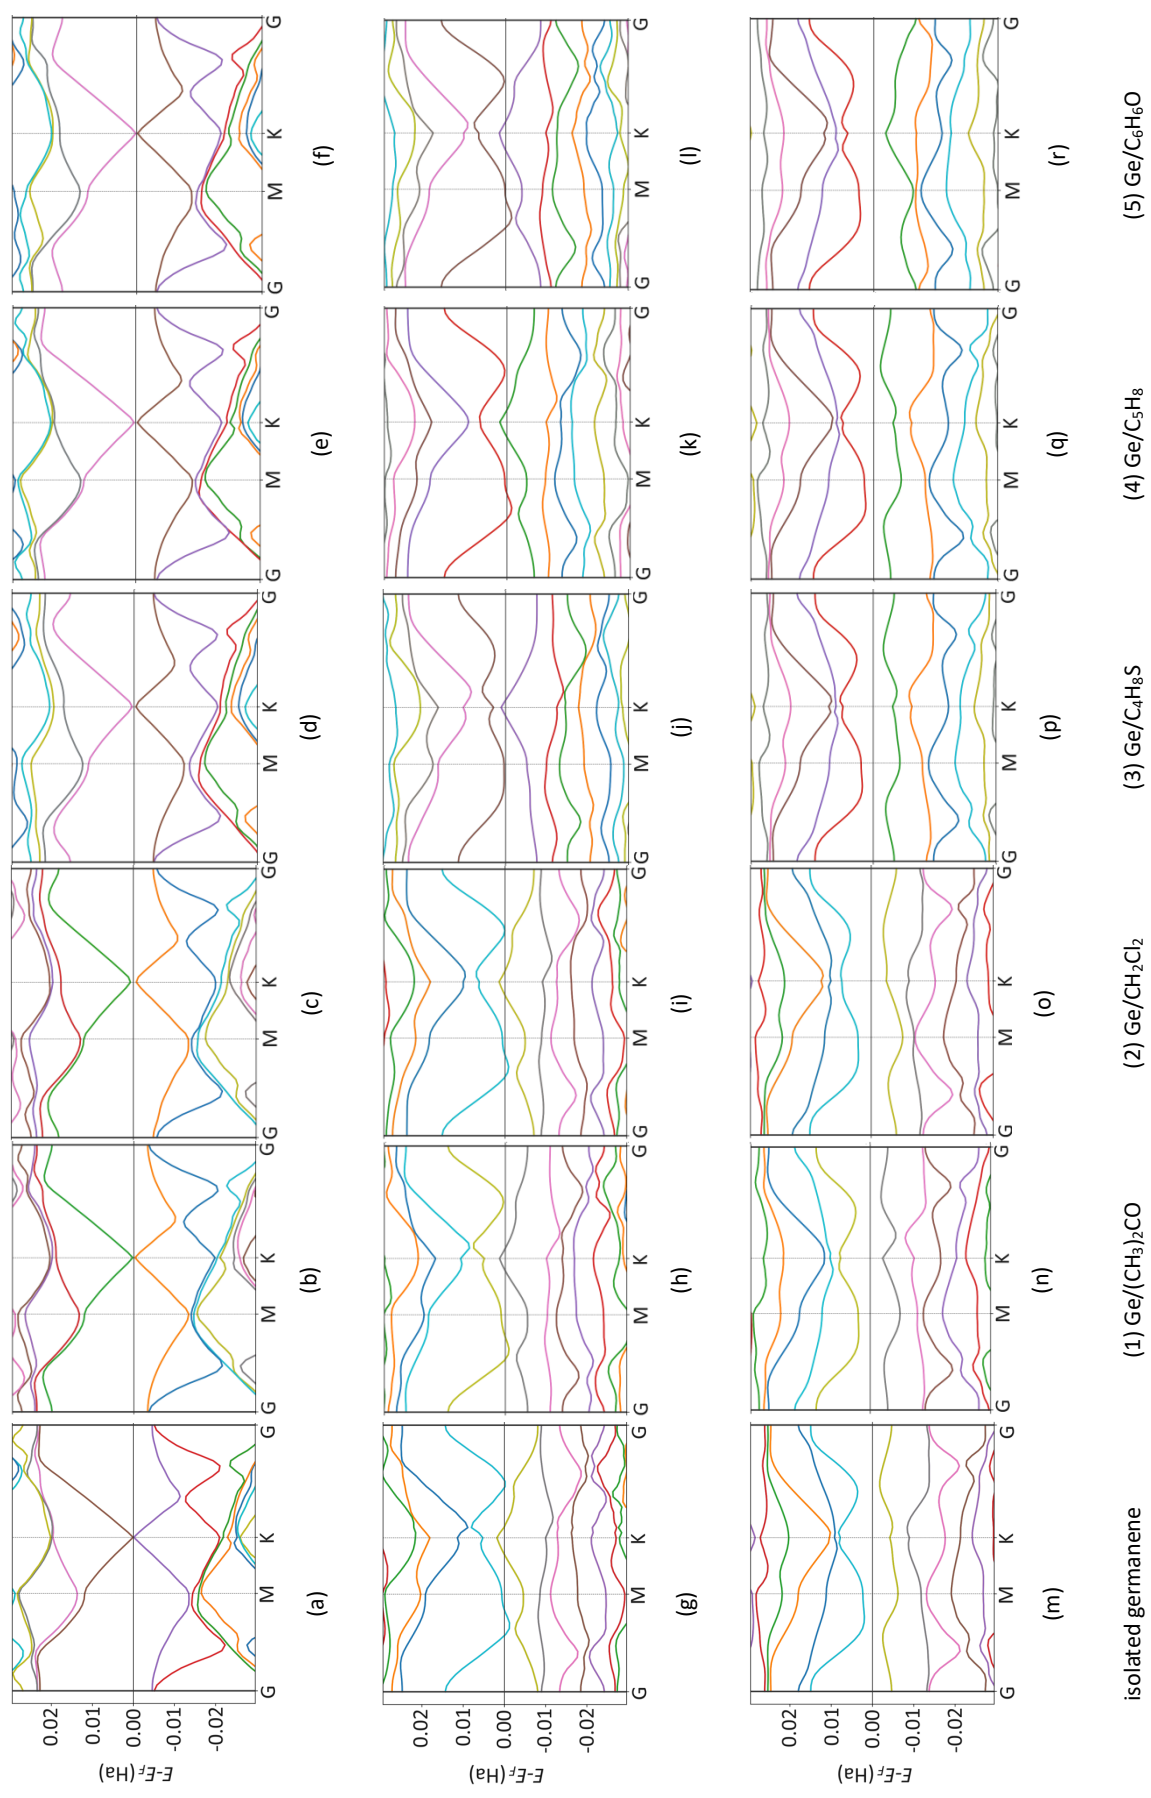

**Figure S1.** The band structure of germanene before and after the VOC adsorption by PBE+vdW-DF2 method. Perfect (top panel), Vacancy-1 (middle panel), and Vacancy-2 (bottom panel). The Fermi level at 0 Ha.

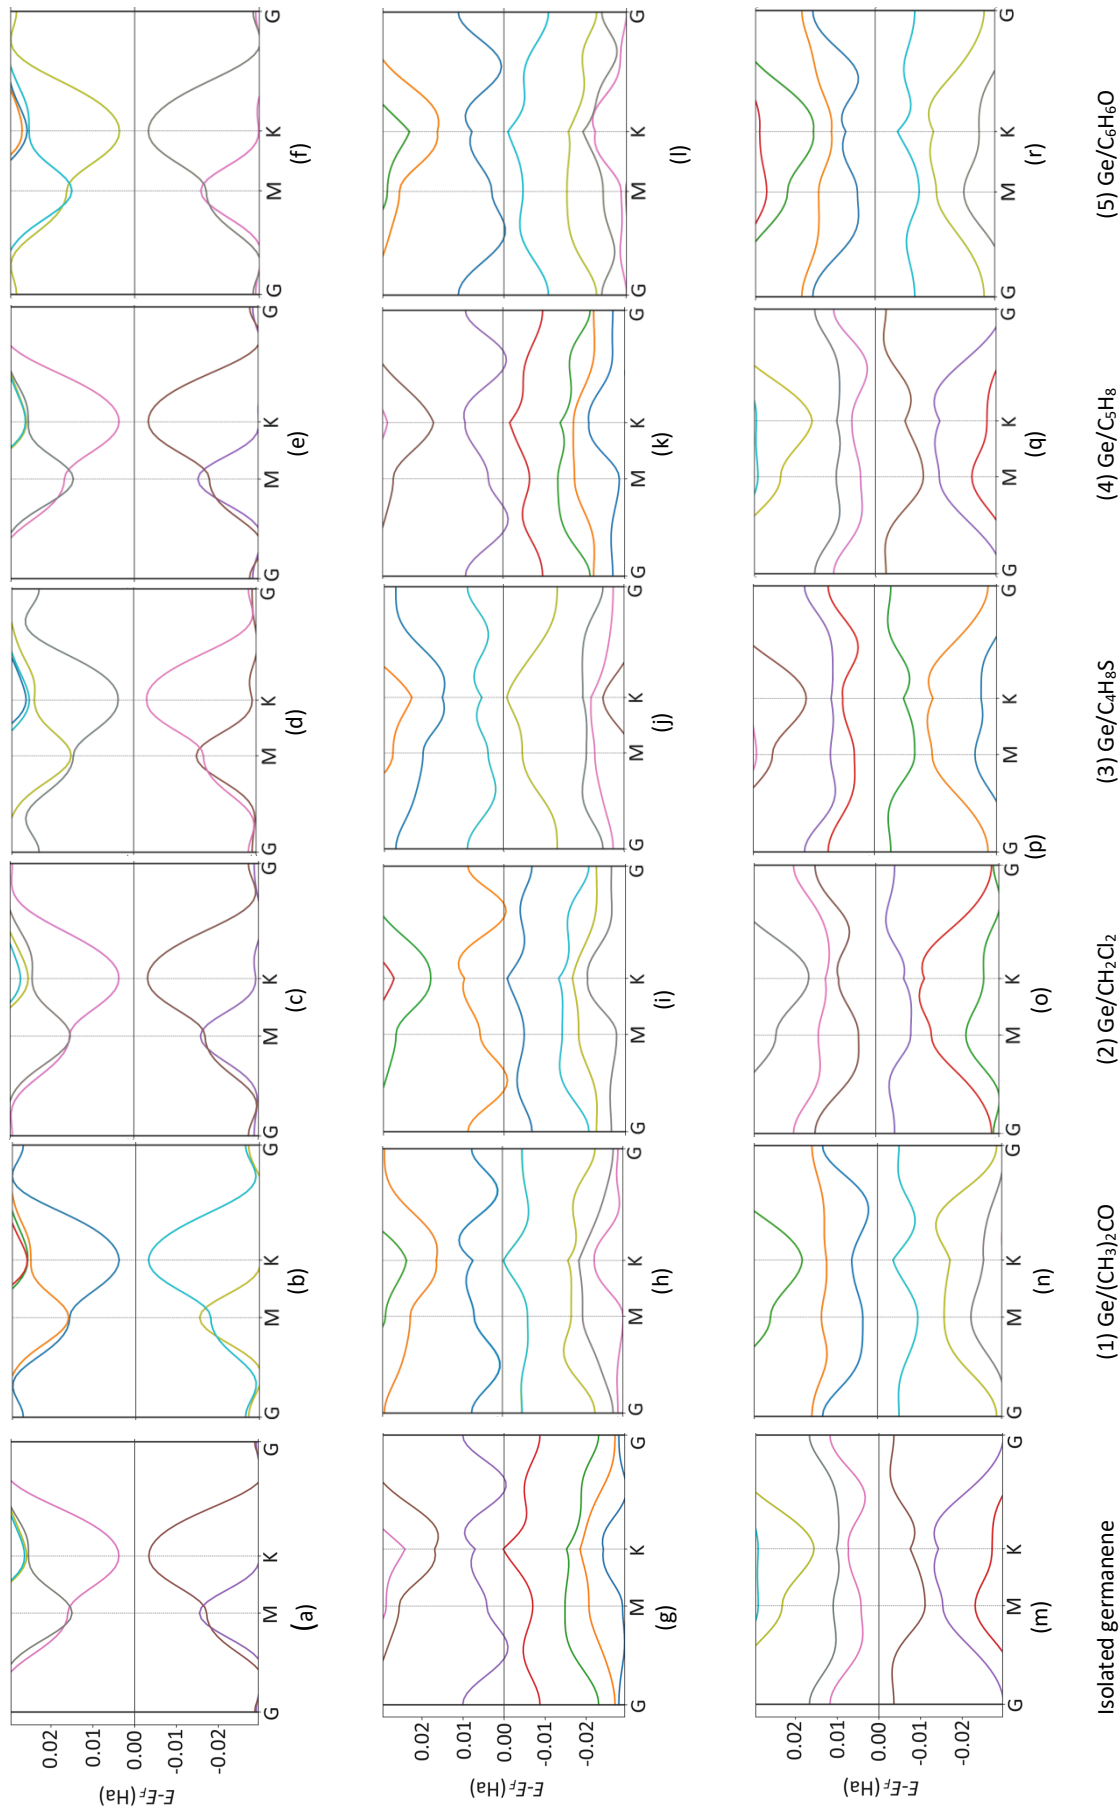

**Figure S2.** The band structure of germanene before and after the VOC adsorption by PBE+HSE06 method. Perfect (top panel), Vacancy-1 (middle panel), and Vacancy-2 (bottom panel). The Fermi level at 0 Ha.
